# Supplementary material for: Functional Dissection of the Blocking and Bypass Activities of the Fab-8 Boundary in the Drosophila Bithorax Complex
Source: PubMed Central journal article supplement (PMC4948906; doi:10.1371/journal.pgen.1006188), 2016-07-18
Supplement: pgen.1006188.s003.pdf [file pgen.1006188.s003.pdf]

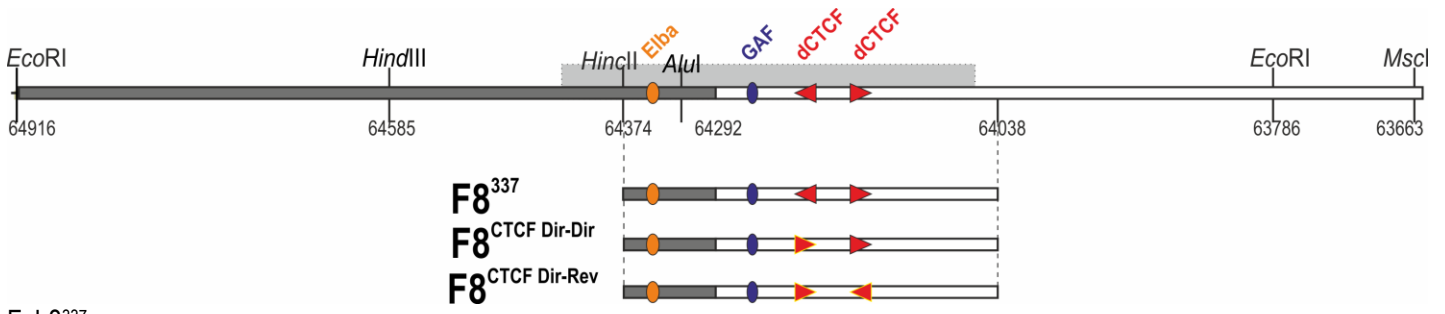

AACGCCAACCAGCACAAACACATT**CGAATAAG**ACTCACTCACACAGTGGCAAGCTGTGCAAGGCATTTGTGTTGGTGAGCAAGCG  
 AAGAGTTCCATTCTCTGCTTCGAAGTACGAAG**GAGAG**AAAGAGTACTTTAAATTTCCACATTCCCGCCTT**GCAGCGCCACCTGGCCT**  
**TGG**TAATGTAGAAGTAGGAAGGAAAGCACCA**CACAAGATGTCGCTCTCCGAC**AGTGGACATGTCGCGTAAAAAATGTTTCGATAAC  
 TTTCAATGGTTCGATTGAACAGACAATAAGTGTATTTAAGACACCAGTTCTTATATTCAAAAATCCTAACAACCTCACATT

Fab-8<sup>CTCF Dir-Dir</sup>

AACGCCAACCAGCACAAACACATT**CGAATAAG**ACTCACTCACACAGTGGCAAGCTGTGCAAGGCATTTGTGTTGGTGAGCAAGCG  
 AAGAGTTCCATTCTCTGCTTCGAAGTAC**GAAGAGAG**AAAGAGTACTTTAAATTTCCACATTCCCGCCTT**GCAGCTTACCAAGGCCA**  
**GGTGCGCTGCAA**TAATGTAGAAGTAGGAAGGAAAGCACCA**CACAAGATGTCGCTCTCCGAC**AGTGGACATGTCGCGTAAAAA  
 TGTTTCGATAACTTTCAATGGTTCGATTGAACAGACAATAAGTGTATTTAAGACACCAGTTCTTATATTCAAAAATCCTAACAACCTCAC  
 ATT

Fab-8<sup>CTCF Dir-Rev</sup>

AACGCCAACCAGCACAAACACATT**CGAATAAG**ACTCACTCACACAGTGGCAAGCTGTGCAAGGCATTTGTGTTGGTGAGCAAGCG  
 AAGAGTTCCATTCTCTGCTTCGAAGTACGAAG**GAGAG**AAAGAGTACTTTAAATTTCCACATTCCCGCCTT**GCAGCTTACCAAGGCCA**  
**GGTGCGCTGCAA**TAATGTAGAAGTAGGAAGGAAAGCACCA**GTCCGAGAGCGACATCTTGTGTTTCGAC**AGTGGACATGTCGCGT  
 AAAAAATGTTTCGATAACTTTCAATGGTTCGATTGAACAGACAATAAGTGTATTTAAGACACCAGTTCTTATATTCAAAAATCCTAACA  
 CTCACATT

Designations: **PTS**; **Elba bs**; **GAF bs**; **CTCF bs**; **inverted sequence**
